# Supplementary material for: Recurrent Rearrangement during Adaptive Evolution in an Interspecific Yeast Hybrid Suggests a Model for Rapid Introgression
Source: PubMed Central journal article supplement (PMC3605161; doi:10.1371/journal.pgen.1003366), 2013-03-21

Supp. Figure 1

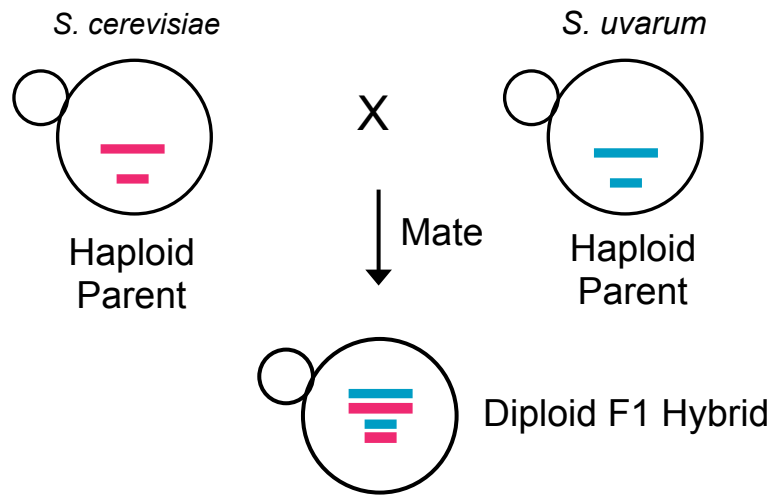

Supplement: pgen.1003366.s001.pdf [file pgen.1003366.s001.pdf]
