# Supplementary material for: Recurrent Rearrangement during Adaptive Evolution in an Interspecific Yeast Hybrid Suggests a Model for Rapid Introgression
Source: PubMed Central journal article supplement (PMC3605161; doi:10.1371/journal.pgen.1003366), 2013-03-21

Figure S2

*S. cerevisiae*

*S. uvarum*

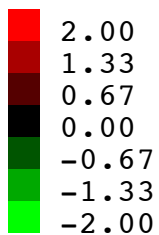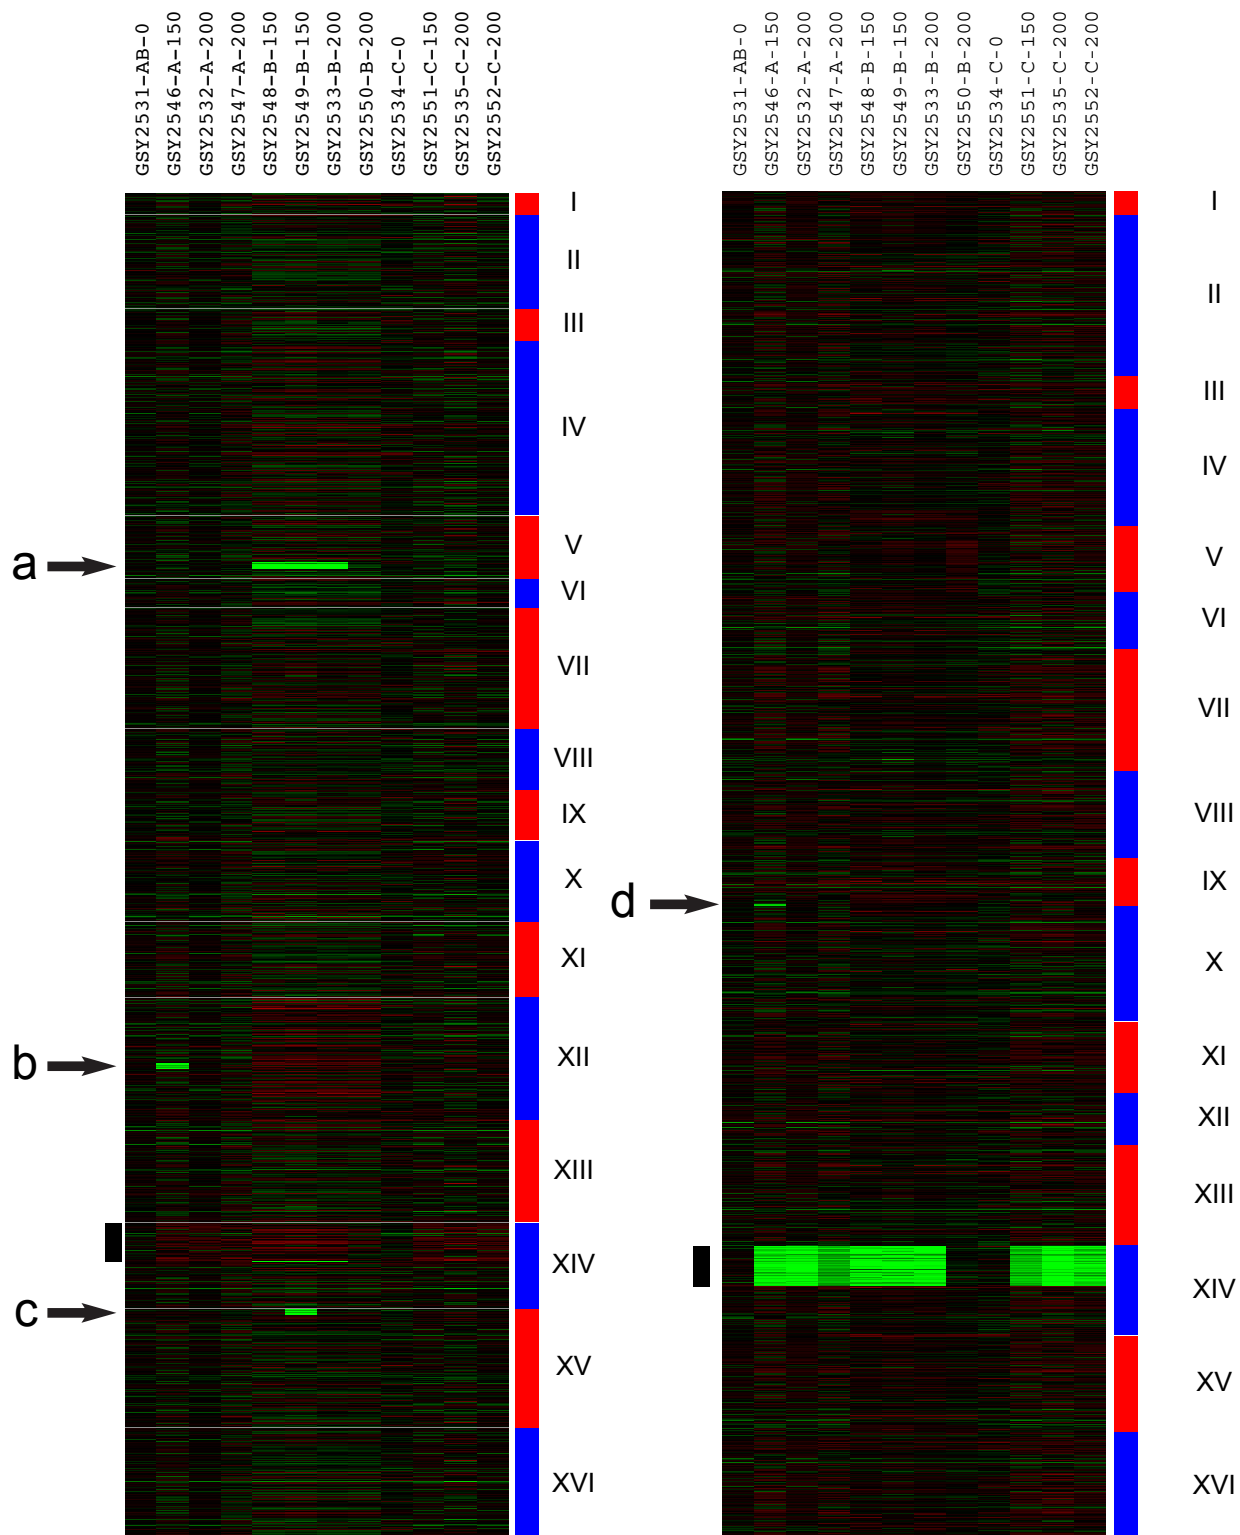

Supplement: pgen.1003366.s002.pdf [file pgen.1003366.s002.pdf]
