# Supplementary material for: Recurrent Rearrangement during Adaptive Evolution in an Interspecific Yeast Hybrid Suggests a Model for Rapid Introgression
Source: PubMed Central journal article supplement (PMC3605161; doi:10.1371/journal.pgen.1003366), 2013-03-21
Supplement: pgen.1003366.s003.pdf [file pgen.1003366.s003.pdf]

Supp. Figure 3A

|                      |                                                                       |     |
|----------------------|-----------------------------------------------------------------------|-----|
| <i>S. uvarum</i>     | CAACATAAACA <b>ATG</b> TCTTACAATTTTACAGGTACGCCACGGGCGAAGGAACGGGTGGTA  | 60  |
| <i>S. cerevisiae</i> | CAATATCAACA <b>ATG</b> TCTTACAATTTTACAGGTACGCCTACAGGCCAAGGAACGGGTGGTA | 60  |
| GSY2532 (Vessel A)   | CAATATCAACA <b>ATG</b> TCTTACAATTTTACAGGTACGCCTACAGGCCAAGGAACGGGTGGTA | 60  |
| GSY2533 (Vessel B)   | CAATATCAACA <b>ATG</b> TCTTACAATTTTACAGGTACGCCTACAGGCCAAGGAACGGGTGGTA | 60  |
| GSY2535 (Vessel C)   | CAATATCAACA <b>ATG</b> TCTTACAATTTTACAGGTACGCCTACAGGCCAAGGAACGGGTGGTA | 60  |
|                      | *** ** ***** ** *****                                                 | 60  |
| <i>S. uvarum</i>     | ACTCATTGACCACAGACTTAAACACCCAATATGATTTGGCTAATATGGGATGGATCGGTG          | 120 |
| <i>S. cerevisiae</i> | ACTCGTTGACAACAGATTTGAATACACAATTTGACTTGCCAACATGGGATGGATCGGTG           | 120 |
| GSY2532              | ACTCGTTGACAACAGATTTGAATACACAATTTGACTTGCCAACATGGGATGGATCGGTG           | 120 |
| GSY2533              | ACTCGTTGACAACAGATTTGAATACACAATTTGACTTGCCAACATGGGATGGATCGGTG           | 120 |
| GSY2535              | ACTCGTTGACAACAGATTTGAATACACAATTTGACTTGCCAACATGGGATGGATCGGTG           | 120 |
|                      | **** ***** ** ** ** ***** ** ***** ** *****                           | 120 |
| <i>S. uvarum</i>     | TAGCTTCCGCAGGTGTCTGGATTATGGTGCCAGGTATCGGTCTGTTATACTCCGGTTTGT          | 180 |
| <i>S. cerevisiae</i> | TGGCTTCAGCAGGTGTGTGGATTATGGTCCCAGGTATCGGTTTATTATATTCTGGTTTAT          | 180 |
| GSY2532              | TGGCTTCAGCAGGTGTGTGGATTATGGTCCCAGGTATCGGTTTATTATATTCTGGTTTAT          | 180 |
| GSY2533              | TGGCTTCAGCAGGTGTGTGGATTATGGTCCCAGGTATCGGTTTATTATATTCTGGTTTAT          | 180 |
| GSY2535              | TGGCTTCAGCAGGTGTGTGGATTATGGTCCCAGGTATCGGTTTATTATATTCTGGTTTAT          | 180 |
|                      | * ***** ***** ***** ***** * ***** ** ***** *                          | 180 |
| <i>S. uvarum</i>     | CTAGGAAAAGCAGCCTTATCTTTGCTTTGGGCCTCGATGATGGCCTCTGCAGTGTGTA            | 240 |
| <i>S. cerevisiae</i> | CCAGGAAAAGCATGCTTTATCCTTGCTTTGGGCCTCGATGATGGCTTCCGCCGTGTGTA           | 240 |
| GSY2532              | CCAGGAAAAGCATGCTTTATCCTTGCTTTGGGCCTCGATGATGGCTTCCGCCGTGTGTA           | 240 |
| GSY2533              | CCAGGAAAAGCATGCTTTATCCTTGCTTTGGGCCTCGATGATGGCTTCCGCCGTGTGTA           | 240 |
| GSY2535              | CCAGGAAAAGCATGCTTTATCCTTGCTTTGGGCCTCGATGATGGCTTCCGCCGTGTGTA           | 240 |
|                      | * ***** ***** ***** ***** ** ** *****                                 | 240 |
| <i>S. uvarum</i>     | TCTTCCAGTGGTTTTTCTGGGGTATTTCGCTGGCCTTCTCACATAACACTAGAGGTCATG          | 300 |
| <i>S. cerevisiae</i> | TTTTCCAATGGTTTTTCTGGGGATACTCATTAGCTTTCTCACACAACACTAGAGGTAACG          | 300 |
| GSY2533              | TTTTCCAATGGTTTTTCTGGGGATACTCATTAGCTTTCTCACACAACACTAGAGGTAACG          | 300 |
| GSY2532              | TTTTCCAATGGTTTTTCTGGGGATACTCATTAGCTTTCTCACACAACACTAGAGGTAACG          | 300 |
| GSY2535              | TTTTCCAATGGTTTTTCTGGGGATACTCATTAGCTTTCTCACACAACACTAGAGGTAACG          | 300 |
|                      | * ***** ***** ** ** * ** ***** ***** ** *                             | 300 |
| <i>S. uvarum</i>     | GTTTCATTGGTACTTTGGAATCCTTTCGGGTTCCGTAACGTTTTGGGGCTCCCTCCAGTG          | 360 |
| <i>S. cerevisiae</i> | GTTTTATTGGTACCTTGAATCCTTTGGGTTTCGTAACGTTTTAGGAGCCCCATCTAGTG           | 360 |
| GSY2532              | GTTTTATTGGTACCTTGAATCCTTTGGGTTTCGTAACGTTTTAGGAGCCCCATCTAGTG           | 360 |
| GSY2533              | GTTTTATTGGTACCTTGAATCCTTTGGGTTTCGTAACGTTTTAGGAGCCCCATCTAGTG           | 360 |
| GSY2535              | GTTTTATTGGTACCTTGAATCCTTTGGGTTTCGTAACGTTTTAGGAGCCCCATCTAGTG           | 360 |
|                      | **** ***** ***** ***** ***** ***** ** ** ** **                        | 360 |
| <i>S. uvarum</i>     | TCAGCTCATTGCCTGACATCTTATTTGCTGTTTACCAAGGTATGTTTGCCGCCGTCACCG          | 420 |
| <i>S. cerevisiae</i> | TCAGTTCTCTTCCCGATATACTGTTTGCCGTTTACCAAGGTATGTTTGCCGCAGTCACCG          | 420 |
| GSY2532              | TCAGTTCTCTTCCCGATATACTGTTTGCCGTTTACCAAGGTATGTTTGCCGCAGTCACCG          | 420 |
| GSY2533              | TCAGTTCTCTTCCCGATATACTGTTTGCCGTTTACCAAGGTATGTTTGCCGCAGTCACCG          | 420 |
| GSY2535              | TCAGTTCTCTTCCCGATATACTGTTTGCCGTTTACCAAGGTATGTTTGCCGCAGTCACCG          | 420 |
|                      | **** ** * ** * * * ***** ***** ***** *****                            | 420 |
| <i>S. uvarum</i>     | GTGCCCTAATGTTGGGTGGTGCTTGCAGAGGGCAAGACTGTTCCCATGATGGTGTCT             | 480 |
| <i>S. cerevisiae</i> | GTGCCCTAATGCTAGGTGGTGCTTGCAGAGGGCAAGGTTGTTTCCTATGATGGTGTCT            | 480 |
| GSY2532              | GTGCCCTAATGCTAGGTGGTGCTTGCAGAGGGCAAGGTTGTTTCCTATGATGGTGTCT            | 480 |
| GSY2533              | GTGCCCTAATGCTAGGTGGTGCTTGCAGAGGGCAAGGTTGTTTCCTATGATGGTGTCT            | 480 |
| GSY2535              | GTGCCCTAATGCTAGGTGGTGCTTGCAGAGGGCAAGGTTGTTTCCTATGATGGTGTCT            | 480 |
|                      | ***** * ***** ***** ** ***** ** ***** ** *****                        | 480 |





Supp. Figure 3A

|                      |                                                              |      |
|----------------------|--------------------------------------------------------------|------|
| <i>S. uvarum</i>     | ACACAGACGCAGAAAAGAATTCCACGCCTTCTGATGTTTCTTCTACCAAGAACACTGACC | 1500 |
| <i>S. cerevisiae</i> | ACACAGACGCAGAAAAGAATTCTACGCCTTCCGACGCTTCTTCTACTAAGAACACTGACC | 1500 |
| GSY2532              | ACACAGACGCAGAAAAGAATTCCACGCCTTCTGATGTTTCTTCTACCAAGAACACTGACC | 1500 |
| GSY2533              | ACACAGACGCAGAAAAGAATTCCACGCCTTCTGATGTTTCTTCTACCAAGAACACTGACC | 1500 |
| GSY2535              | ACACAGACGCAGAAAAGAATTCCACGCCTTCTGATGTTTCTTCTACCAAGAACACTGACC | 1500 |
|                      | ***** ** * *****                                             | 1500 |
| <br>                 |                                                              |      |
| <i>S. uvarum</i>     | ATATAGTATAATGATATACCCGTACAGACTATGCTCTTATTTTTTACTCATTATGTAATC | 1560 |
| <i>S. cerevisiae</i> | ATATAGTATAATGATATACTCAAGCAGACTATGATTTA-TGTTAATCTTTATGTAACG   | 1560 |
| GSY2532              | ATATAGTATAATGATATACCCGTACAGACTATGCTCTTATTTTTTACTCATTATGTAATC | 1560 |
| GSY2533              | ATATAGTATAATGATATACCCGTACAGACTATGCTCTTATTTTTTACTCATTATGTAATC | 1560 |
| GSY2535              | ATATAGTATAATGATATACCCGTACAGACTATGCTCTTATTTTTTACTCATTATGTAATC | 1560 |
|                      | ***** * ***** * ** * *****                                   | 1560 |

Supp. Figure 3B

*S. uvarum* MSYNFTGTPTGEGTGGNSLTTDLNTQYDLANMGWIGVASAGVWIMVPGIGLLYSGLSRKK 60  
*S. cerevisiae* MSYNFTGTPTGEGTGGNSLTTDLNTQFDLANMGWIGVASAGVWIMVPGIGLLYSGLSRKK 60  
GSY2532 MSYNFTGTPTGEGTGGNSLTTDLNTQFDLANMGWIGVASAGVWIMVPGIGLLYSGLSRKK 60  
GSY2533 MSYNFTGTPTGEGTGGNSLTTDLNTQFDLANMGWIGVASAGVWIMVPGIGLLYSGLSRKK 60  
GSY2535 MSYNFTGTPTGEGTGGNSLTTDLNTQFDLANMGWIGVASAGVWIMVPGIGLLYSGLSRKK 60  
\*\*\*\*\*:\*\*\*\*\* 60

*S. uvarum* HALSLLWASMMASAVCIFQWFFWGYSLAFSHNTRGHGFIGTLEFFGFRNVLGAPSSVSSL 120  
*S. cerevisiae* HALSLLWASMMASAVCIFQWFFWGYSLAFSHNTRGNNGFIGTLEFFGFRNVLGAPSSVSSL 120  
GSY2532 HALSLLWASMMASAVCIFQWFFWGYSLAFSHNTRGNNGFIGTLEFFGFRNVLGAPSSVSSL 120  
GSY2533 HALSLLWASMMASAVCIFQWFFWGYSLAFSHNTRGNNGFIGTLEFFGFRNVLGAPSSVSSL 120  
GSY2535 HALSLLWASMMASAVCIFQWFFWGYSLAFSHNTRGNNGFIGTLEFFGFRNVLGAPSSVSSL 120  
\*\*\*\*\*:\*\*\*\*\* 120

*S. uvarum* PDILFAVYQGMFAAVTGALMLGGACERARLFPMMVFLFLWMTVVYCP IACWVWNAEGWL V 180  
*S. cerevisiae* PDILFAVYQGMFAAVTGALMLGGACERARLFPMMVFLFLWMTIVYCP IACWVWNAEGWL V 180  
GSY2532 PDILFAVYQGMFAAVTGALMLGGACERARLFPMMVFLFLWMTVVYCP IACWVWNAEGWL V 180  
GSY2533 PDILFAVYQGMFAAVTGALMLGGACERARLFPMMVFLFLWMTIVYCP IACWVWNAEGWL V 180  
GSY2535 PDILFAVYQGMFAAVTGALMLGGACERARLFPMMVFLFLWMTIVYCP IACWVWNAEGWL V 180  
\*\*\*\*\*:\*\*\*\*\* 180

*S. uvarum* KLGSLDYAGGLCVHLTSGHGGLVYALILGRNDP VTRKGM PKYKPHSVTSVVLGT VFLWF 240  
*S. cerevisiae* KLGSLDYAGGLCVHLTSGHGGLVYALILGRNDP VTRKGM PKYKPHSVTSVVLGT VFLWF 240  
GSY2532 KLGSLDYAGGLCVHLTSGHGGLVYALILGRNDP VTRKGM PKYKPHSVTSVVLGT VFLWF 240  
GSY2533 KLGSLDYAGGLCVHLTSGHGGLVYALILGRNDP VTRKGM PKYKPHSVTSVVLGT VFLWF 240  
GSY2535 KLGSLDYAGGLCVHLTSGHGGLVYALILGRNDP VTRKGM PKYKPHSVTSVVLGT VFLWF 240  
\*\*\*\*\*.\*\*\*\*\* 240

*S. uvarum* GWMFFNGGSAGNATIRAWYSIMSTNLAAACGGLTWMVIDYFRSGR KWT VGLCSGIIAGL 300  
*S. cerevisiae* GWMFFNGGSAGNATIRAWYSIMSTNLAAACGGLTWMVIDYFRSGR KWT VGLCSGIIAGL 300  
GSY2532 GWMFFNGGSAGNATIRAWYSIMSTNLAAACGGLTWMVIDYFRSGR KWT VGLCSGIIAGL 300  
GSY2533 GWMFFNGGSAGNATIRAWYSIMSTNLAAACGGLTWMVIDYFRSGR KWT VGLCSGIIAGL 300  
GSY2535 GWMFFNGGSAGNATIRAWYSIMSTNLAAACGGLTWMVIDYFRSGR KWT VGLCSGIIAGL 300  
\*\*\*\*\*.\*\*\*\*\* 300

*S. uvarum* VGITPAAGFVPIWSAVVIGVVTGAGCNLAVDLKGLL GIDDGLDCYSIHGVGACIGCVLTG 360  
*S. cerevisiae* VGITPAAGFVPIWSAVVIGVVTGAGCNLAVDLKSLLRIDDGLDCYSIHGVGACIGCVLTG 360  
GSY2532 VGITPAAGFVPIWSAVVIGVVTGAGCNLAVDLKGLL GIDDGLDCYSIHGVGACIGCVLTG 360  
GSY2533 VGITPAAGFVPIWSAVVIGVVTGAGCNLAVDLKSLLRIDDGLDCYSIHGVGACIGCVLTG 360  
GSY2535 VGITPAAGFVPIWSAVVIGVVTGAGCNLAVDLKGLL GIDDGLDCYSIHGVGACIGCVLTG 360  
\*\*\*\*\*.\*\*\*.\*\*\*\* 360

*S. uvarum* IFAADYVNATAGSYISPIAGGWINKHYKQVGYQLAGMCAALAWTVTVTSILLVTMNAIPF 420  
*S. cerevisiae* IFAADYVNATAGSYISPIDGGWINHHYKQVGYQLAGMCAALAWTVTVTSILLVTMNAIPF 420  
GSY2532 IFAADYVNATAGSYISPIAGGWINKHYKQVGYQLAGMCAALAWTVTVTSILLVTMNAIPF 420  
GSY2533 IFAADYVNATAGSYISPIAGGWINKHYKQVGYQLAGMCAALAWTVTVTSILLVTMNAIPF 420  
GSY2535 IFAADYVNATAGSYISPIAGGWINKHYKQVGYQLAGMCAALAWTVTVTSILLVTMNAIPF 420  
\*\*\*\*\*:\*\*\*\*\*:\*\*\*\*\*:\*\*\*\*\* 420

*S. uvarum* LKLRLSADEEELGTDAAQIGEFITYEESTAYIPEPIRSRTSAQMPPPHETIDDKIVANTDA 480  
*S. cerevisiae* LKLRLSADEEELGTDAAQIGEFITYEESTAYIPEPIRSKTS AQMPPPHENIDDKIVANTDA 480  
GSY2532 LKLRLSADEEELGTDAAQIGEFITYEESTAYIPEPIRSRTSAQMPPPHETIDDKIVANTDA 480  
GSY2533 LKLRLSADEEELGTDAAQIGEFITYEESTAYIPEPIRSRTSAQMPPPHETIDDKIVANTDA 480  
GSY2535 LKLRLSADEEELGTDAAQIGEFITYEESTAYIPEPIRSRTSAQMPPPHETIDDKIVANTDA 480  
\*\*\*\*\*.\*\*\*\*\*.\*\*\*\*\*.\*\*\*\* 480

*S. uvarum* EKNSTPSDV SSKNTDHIV 499  
*S. cerevisiae* EKNSTPSDASSTKNTDHIV 499  
GSY2532 EKNSTPSDV SSKNTDHIV 499  
GSY2533 EKNSTPSDV SSKNTDHIV 499  
GSY2535 EKNSTPSDV SSKNTDHIV 499  
\*\*\*\*\*.\*\*\*\*\*
