# Supplementary material for: Recurrent Rearrangement during Adaptive Evolution in an Interspecific Yeast Hybrid Suggests a Model for Rapid Introgression
Source: PubMed Central journal article supplement (PMC3605161; doi:10.1371/journal.pgen.1003366), 2013-03-21
Supplement: pgen.1003366.s004.pdf [file pgen.1003366.s004.pdf]

Supp. Figure 4A

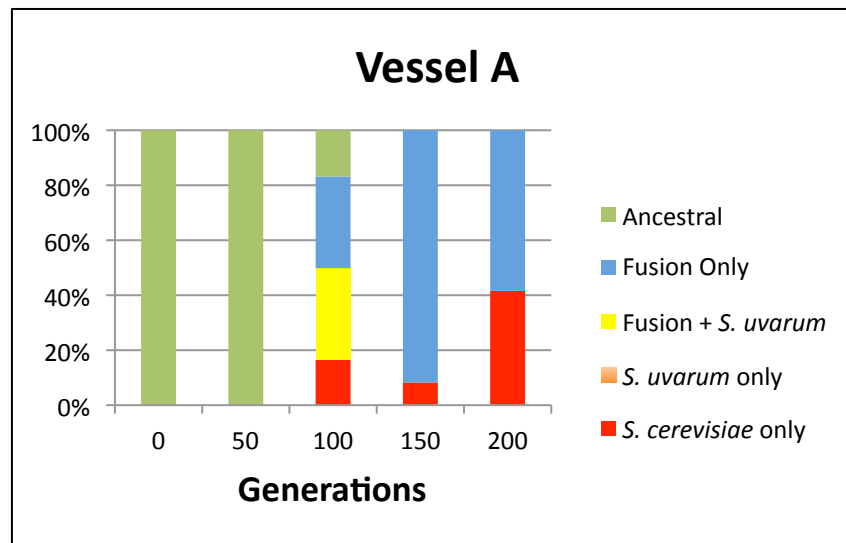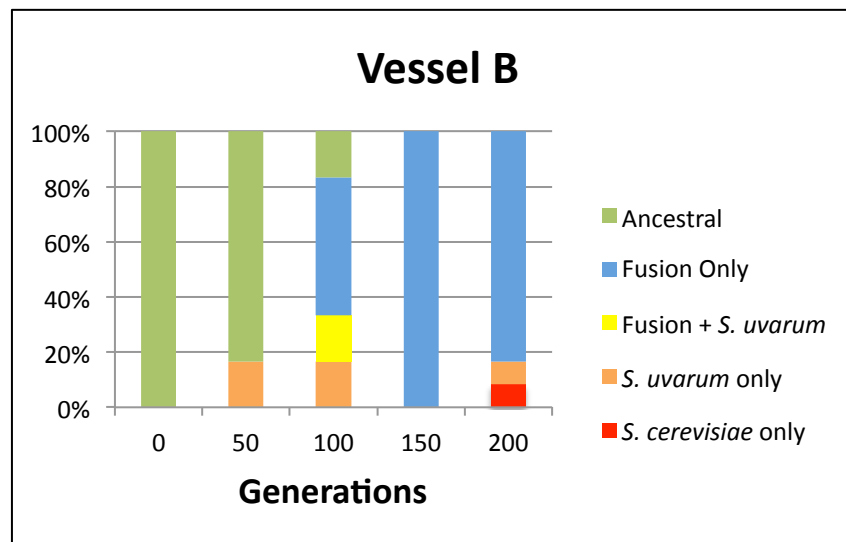

Supp. Figure 4B

|                      |                                                              |     |
|----------------------|--------------------------------------------------------------|-----|
| <i>S. uvarum</i>     | CAACATAAACAATGTCTTACAATTTTACAGGTACGCCACGGGCGAAGGAACGGGTGGTA  | 60  |
| <i>S. cerevisiae</i> | CAATATCAACAATGTCTTACAATTTTACAGGTACGCCTACAGGCGAAGGAACGGGTGGTA | 60  |
| Vessel A             | *** ** *****                                                 | 60  |
| Vessel B             | *** ** *****                                                 | 60  |
| Vessel C             | *** ** *****                                                 | 60  |
| <i>S. uvarum</i>     | ACTCATTGACCACAGACTTAAACACCCAATATGATTTGGCTAATATGGGATGGATCGGTG | 120 |
| <i>S. cerevisiae</i> | ACTCGTTGACAACAGATTTGAATACACAATTTGACTTGGCCAACATGGGATGGATCGGTG | 120 |
| Vessel A             | **** ***** ** ** ** **                                       | 120 |
| Vessel B             | **** ***** ** ** **                                          | 120 |
| Vessel C             | **** ***** ** ** **                                          | 120 |
| <i>S. uvarum</i>     | TAGCTTCCGCAGGTGTCTGGATTATGGTGCCAGGTATCGGTCTGTTATACTCCGTTTGT  | 180 |
| <i>S. cerevisiae</i> | TGGCTTCAGCAGGTGTGTGGATTATGGTCCCAGGTATCGGTTTATTATATTCTGGTTTAT | 180 |
| Vessel A             | * ***** ***** ***** ***** * ***** ** ***** *                 | 180 |
| Vessel B             | * ***** ***** ***** ***** * ***** ** ***** *                 | 180 |
| Vessel C             | * ***** ***** ***** ***** * ***** ** ***** *                 | 180 |
| <i>S. uvarum</i>     | CTAGGAAAAAGCAGCCTTTATCTTTGCTTTGGGCCTCGATGATGGCCTCTGCAGTGTGTA | 240 |
| <i>S. cerevisiae</i> | CCAGGAAAAAGCATGCTTTATCCTTGCTTTGGGCCTCGATGATGGCTTCCGCCGTGTGTA | 240 |
| Vessel A             | * ***** ***** ***** ***** ** ** *****                        | 240 |
| Vessel B             | * ***** ***** ***** ***** ** ** *****                        | 240 |
| Vessel C             | * ***** ***** ***** ***** ** ** *****                        | 240 |
|                      | (1 100-gen) (1 100-gen)                                      |     |
| <i>S. uvarum</i>     | TCTTCCAGTGGTTTTTCTGGGGTATTCGCTGGCCTTCTCACATAACACTAGAGGTCATG  | 300 |
| <i>S. cerevisiae</i> | TTTTCCAATGGTTTTTCTGGGGATACTCATTAGCTTCTCACACAACACTAGAGGTAACG  | 300 |
| Vessel A             | * ***** ***** ** ** * ** ***** ***** * *                     | 300 |
| Vessel B             | * ***** ***** ** ** * ** ***** ***** * *                     | 300 |
| Vessel C             | * ***** ***** ** ** * ** ***** ***** * *                     | 300 |
|                      | (1 100-gen)                                                  |     |
| <i>S. uvarum</i>     | GTTTCATTGGTACTTTGGAATTCTTCGGGTTCCGTAACGTTTTGGGGGCTCCCTCCAGTG | 360 |
| <i>S. cerevisiae</i> | GTTTTATTGGTACCTTGAATTCTTTGGGTTTCGTAACGTTTTAGGAGCCCCATCTAGTG  | 360 |
| Vessel A             | **** ***** ***** ***** ***** ***** ** ** ** **               | 360 |
| Vessel B             | **** ***** ***** ***** ***** ***** ** ** **                  | 360 |
| Vessel C             | **** ***** ***** ***** ***** ***** ** ** **                  | 360 |
| <i>S. uvarum</i>     | TCAGCTCATTGCCTGACATCTTATTTGCTGTTACCAAGGTATGTTGCCGCCGTCACCG   | 420 |
| <i>S. cerevisiae</i> | TCAGTTCTCTCCCGATATACTGTTGCCGTTTACCAAGGTATGTTGCCGCAGTCACCG    | 420 |
| Vessel A             | **** * * * * * * * ***** ***** *****                         | 420 |
| Vessel B             | **** * * * * * * * ***** ***** ***** *****                   | 420 |
| Vessel C             | **** * * * * * * * ***** ***** ***** *****                   | 420 |
|                      | (1 100-gen)                                                  |     |
| <i>S. uvarum</i>     | GTGCCCTAATGTTGGGTGGTGCTTGCAGAAAGAGCAAGACTGTTCCCATGATGGTGTCT  | 480 |
| <i>S. cerevisiae</i> | GTGCCCTAATGCTAGGTGGTGCCTGCGAGAGGGCAAGGTTGTTTCCATGATGGTGTCT   | 480 |
| Vessel A             | ***** * ***** ***** ** ***** ***** ** *****                  | 480 |
| Vessel B             | ***** * ***** ***** ** ***** ***** ** *****                  | 480 |
| Vessel C             | ***** * ***** ***** ** ***** ***** ** *****                  | 480 |
| <i>S. uvarum</i>     | TATTCTTATGGATGACTGTCGTCTACTGTCCAATTGCTTGGGTCTGGAACGCAGAAG    | 540 |
| <i>S. cerevisiae</i> | TGTTTTTATGGATGACTATTGTTTATTGTCTTATGTCATGCTGGGTCTGGAATGCCGAGG | 540 |
| Vessel A             | * ** ***** * ** ** ***** ***** ***** ** ** *                 | 540 |
| Vessel B             | * ** ***** * ** ** ***** ***** ***** ***** ** ** *           | 540 |
| Vessel C             | * ** ***** * ** ** ***** ***** ***** ***** ** ** *           | 540 |

GSY2532

(many, see legend)

Supp. Figure 4B

*S. uvarum* GCTGGTTGGTCAAGTTAGGCAGTTTGGACTATGCTGGTGGGTTATGTGTTTCATTTGACTT 600  
*S. cerevisiae* GTTGGTTGGTCAAATTGGGTAGCTTGGACTATGCAGGTGGTTTATGTGTCCATTTAACAT 600  
 Vessel A \* \*\*\*\*\* \*\* \*\* \* \*\*\*\*\* \*\*\*\*\* \*\*\*\*\* \*\*\*\*\* \*\* \* 600  
 Vessel B \* \*\*\*\*\* \*\* \*\* \* \*\*\*\*\* \*\*\*\*\* \*\*\*\*\* \*\*\*\*\* \*\* \* 600  
 Vessel C \* \*\*\*\*\* \*\* \*\* \* \*\*\*\*\* \*\*\*\*\* \*\*\*\*\* \*\*\*\*\* \*\* \* 600

**GSY2535**

*S. uvarum* CCGGCCATGGTGGGTTGGTCTACGCCTTGATATTGGGTAGACGTAACGACCCTGTGACAC 660  
*S. cerevisiae* CTGGACATGGTGGTCTAGTTTACGCTTTGATACTGGGTAAGCGTAATGACCCTGTTACAC 660  
 Vessel A \* \* \*\*\*\*\* \* \*\* \*\*\*\*\* \*\*\*\*\* \*\*\*\*\* \*\*\*\*\* \*\*\*\*\* \*\*\*\*\* 660  
 Vessel B \* \* \*\*\*\*\* \* \*\* \*\*\*\*\* \*\*\*\*\* \*\*\*\*\* \*\*\*\*\* \*\*\*\*\* \*\*\*\*\* 660  
 Vessel C \* \* \*\*\*\*\* \* \*\* \*\*\*\*\* \*\*\*\*\* \*\*\*\*\* \*\*\*\*\* \*\*\*\*\* \*\*\*\*\* 660

*S. uvarum* GCAAGGGAATGCCCAAGTACAAGCCACATTCGGTCACCTCCGTGGTGTAGGAACGTGTG 720  
*S. cerevisiae* GTAAAGGGATGCCCAAGTACAACCACATTCGGTCACCTCCGTGGTGTAGGCACAGTGT 720  
 Vessel A \* \* \* \*\*\*\*\* \*\*\*\*\* \*\*\*\*\* \*\*\*\*\* \*\*\*\*\* \*\*\*\*\* \*\*\*\*\* 720  
 Vessel B \* \* \* \*\*\*\*\* \*\*\*\*\* \*\*\*\*\* \*\*\*\*\* \*\*\*\*\* \*\*\*\*\* \*\*\*\*\* 720  
 Vessel C \* \* \* \*\*\*\*\* \*\*\*\*\* \*\*\*\*\* \*\*\*\*\* \*\*\*\*\* \*\*\*\*\* \*\*\*\*\* 720

*S. uvarum* TTTTATGGTTCGGTTGGATGTTCTTCAACGGTGGCTCTGCCGGAATGCCACCATACGAG 780  
*S. cerevisiae* TCTTATGGTTCGGTTGGATGTTCTTCAACGGAGGCTCTGCAGGTAATGCAACTATACGAG 780  
 Vessel A \* \*\*\*\*\* \*\*\*\*\* \*\*\*\*\* \*\*\*\*\* \*\*\*\*\* \*\*\*\*\* \*\*\*\*\* \*\*\*\*\* 780  
 Vessel B \* \*\*\*\*\* \*\*\*\*\* \*\*\*\*\* \*\*\*\*\* \*\*\*\*\* \*\*\*\*\* \*\*\*\*\* \*\*\*\*\* 780  
 Vessel C \* \*\*\*\*\* \*\*\*\*\* \*\*\*\*\* \*\*\*\*\* \*\*\*\*\* \*\*\*\*\* \*\*\*\*\* \*\*\*\*\* 780

*S. uvarum* CATGGTACTCTATAATGTCCACCAACTTGGCTGCTGCTTGCAGGTGGGTTGACCTGGATGG 840  
*S. cerevisiae* CATGGTACTCTATTATGTCCACAACTTAGCTGCTGCTTGCAGGTGGGTTGACATGGATGG 840  
 Vessel A \*\*\*\*\* \*\*\*\*\* \*\*\*\*\* \*\*\*\*\* \*\*\*\*\* \*\*\*\*\* \*\*\*\*\* \*\*\*\*\* 840  
 Vessel B \*\*\*\*\* \*\*\*\*\* \*\*\*\*\* \*\*\*\*\* \*\*\*\*\* \*\*\*\*\* \*\*\*\*\* \*\*\*\*\* 840  
 Vessel C \*\*\*\*\* \*\*\*\*\* \*\*\*\*\* \*\*\*\*\* \*\*\*\*\* \*\*\*\*\* \*\*\*\*\* \*\*\*\*\* 840

*S. uvarum* TGATCGATTATTCAGATCTGGTAGAAAGTGGACCCTGTCGGTCTATGTTTCAGGTATCA 900  
*S. cerevisiae* TTATCGATTATTCAGATGCGGAAGAAAGTGGACTACAGTTGGTTTGTGTTTCAGGTATCA 900  
 Vessel A \* \*\*\*\*\* \* \*\*\*\*\* \* \* \* \* \* \*\*\*\*\* 900  
 Vessel B \* \*\*\*\*\* \* \*\*\*\*\* \* \* \* \* \* \*\*\*\*\* 900  
 Vessel C \* \*\*\*\*\* \* \*\*\*\*\* \* \* \* \* \* \*\*\*\*\* 900

(2 100-gen)

(many, see legend)

*S. uvarum* TTGCCGGTCTAGTCGGTATCACTCCAGCCGCTGGGTTTGTACCAATCTGGTCTGCCGTTG 960  
*S. cerevisiae* TCGTGGCCTAGTGGGTATCACCCAGCCGCGGTTTCGTGCCAATCTGGTTCAGCCGTTG 960  
 Vessel A \* \* \* \* \* \*\*\*\*\* \*\*\*\*\* \*\*\*\*\* \*\*\*\*\* \*\*\*\*\* \*\*\*\*\* \*\*\*\*\* 960  
 Vessel B \* \* \* \* \* \*\*\*\*\* \*\*\*\*\* \*\*\*\*\* \*\*\*\*\* \*\*\*\*\* \*\*\*\*\* \*\*\*\*\* 960  
 Vessel C \* \* \* \* \* \*\*\*\*\* \*\*\*\*\* \*\*\*\*\* \*\*\*\*\* \*\*\*\*\* \*\*\*\*\* \*\*\*\*\* 960

*S. uvarum* TCATTGGTGTGGTCACTGGTGCAGGTTGTAATCTTGCTGTTGACTTGAAGGGCTTATTAG 1020  
*S. cerevisiae* TCATTGGTGTGGTTACTGGTGCAGGATGTAACCTTGCTGTTGACTTAAAGAGTCTATTGC 1020  
 Vessel A \*\*\*\*\* \*\*\*\*\* \*\*\*\*\* \*\*\*\*\* \*\*\*\*\* \*\*\*\*\* \*\*\*\*\* \*\*\*\*\* 1020  
 Vessel B \*\*\*\*\* \*\*\*\*\* \*\*\*\*\* \*\*\*\*\* \*\*\*\*\* \*\*\*\*\* \*\*\*\*\* \*\*\*\*\* 1020  
 Vessel C \*\*\*\*\* \*\*\*\*\* \*\*\*\*\* \*\*\*\*\* \*\*\*\*\* \*\*\*\*\* \*\*\*\*\* \*\*\*\*\* 1020

*S. uvarum* GTATTGACGATGGTTAGACTGTTACTCTATCCATGGTGTGGGTGCTTGTATTGGCTGTG 1080  
*S. cerevisiae* GCATCGATGATGGTCTAGATTGTTACTCTATCCATGGTGTGGGTGGTGTATTGGTCTG 1080  
 Vessel A \* \* \* \* \* \*\*\*\*\* \*\*\*\*\* \*\*\*\*\* \*\*\*\*\* \*\*\*\*\* \*\*\*\*\* \*\*\*\*\* 1080  
 Vessel B \* \* \* \* \* \*\*\*\*\* \*\*\*\*\* \*\*\*\*\* \*\*\*\*\* \*\*\*\*\* \*\*\*\*\* \*\*\*\*\* 1080  
 Vessel C \* \* \* \* \* \*\*\*\*\* \*\*\*\*\* \*\*\*\*\* \*\*\*\*\* \*\*\*\*\* \*\*\*\*\* \*\*\*\*\* 1080

**GSY2533**

(many, see legend)

Supp. Figure 4B

*S. uvarum* TGCTAACTGGTATCTTTGCCGCTGATTACGTCAATGCCACTGCCGGTTCTTACATCAGTC 1140  
*S. cerevisiae* TATTAACTGGTATCTTTGCTGCAGACTATGTAAATGCCACTGCAGGCTCTTACATTAGTC 1140  
Vessel A \* \*\*\*\*\* \*\* \*\* \*\* \*\* \*\*\*\*\* \*\* \*\* \*\*\*\*\* \*\* 1140  
Vessel B \* \*\*\*\*\* \*\* \*\* \*\* \*\* \*\*\*\*\* \*\* \*\* \*\*\*\*\* \*\* 1140  
Vessel C \* \*\*\*\*\* \*\* \*\* \*\* \*\* \*\*\*\*\* \*\* \*\* \*\*\*\*\* \*\* 1140

*S. uvarum* CCATCGCCGGTGGCTGGATCAACAAACACTACAAACAAGTCGGTTATCAATTGGCTGGTA 1200  
*S. cerevisiae* CAATTGATGGTGGCTGGATCAATCATCACTATAAACAAGTTGGTTATCAATTAGCAGGTA 1200  
Vessel A \* \* \* \*\*\*\*\* \* \*\*\*\*\* \*\*\*\*\* \*\*\*\*\* \*\* \*\* 1200  
Vessel B \* \* \* \*\*\*\*\* \* \*\*\*\*\* \*\*\*\*\* \*\*\*\*\* \*\* \*\* 1200  
Vessel C \* \* \* \*\*\*\*\* \* \*\*\*\*\* \*\*\*\*\* \*\*\*\*\* \*\* \*\* 1200

*S. uvarum* TGTGTGCTGCGCTAGCATGGACCGTTACTGTACATCTATATTGCTAGTGACTATGAACG 1260  
*S. cerevisiae* TATGCGCTGCACTAGCCTGGACTGTTACTGTACATCTATCTTGCTTCTAACTATGAATG 1260  
Vessel A \* \* \* \*\*\*\*\* \*\*\*\*\* \*\*\*\*\* \*\*\*\*\* \*\*\*\*\* \* \*\*\*\*\* \* 1260  
Vessel B \* \* \* \*\*\*\*\* \*\*\*\*\* \*\*\*\*\* \*\*\*\*\* \*\*\*\*\* \* \*\*\*\*\* \* 1260  
Vessel C \* \* \* \*\*\*\*\* \*\*\*\*\* \*\*\*\*\* \*\*\*\*\* \*\*\*\*\* \* \*\*\*\*\* \* 1260

*S. uvarum* CCATCCCATTTTTGAAGCTAAGATTAAGCGCCGATGAGGAAGAATTAGGTACTGATGCTG 1320  
*S. cerevisiae* CCATTCCATTTTTAAACTAAGATTAAGTGCTGATGAGGAAGAATTAGGTACCGACGCTG 1320  
Vessel A \*\*\*\*\* \*\*\*\*\* \*\* \*\*\*\*\* \*\* \*\*\*\*\* \*\*\*\*\* \*\*\*\*\* \*\* \*\* 1320  
Vessel B \*\*\*\*\* \*\*\*\*\* \*\* \*\*\*\*\* \*\* \*\*\*\*\* \*\*\*\*\* \*\*\*\*\* \*\* \*\* 1320  
Vessel C \*\*\*\*\* \*\*\*\*\* \*\* \*\*\*\*\* \*\* \*\*\*\*\* \*\*\*\*\* \*\*\*\*\* \*\* \*\* 1320

*S. uvarum* CTCAAATCGGTGAATTCACCTACGAGGAATCCACCGCTTATATTCCAGAACCAATCAGAT 1380  
*S. cerevisiae* CTCAAATTGGTGAATTTACATACGAGGAATCCACTGCTTACATCCAGAACCAATCAGAT 1380  
Vessel A \*\*\*\*\* \*\*\*\*\* \*\* \*\*\*\*\* \*\*\*\*\* \*\* \*\*\*\*\* \*\*\*\*\* \*\*\*\*\* 1380  
Vessel B \*\*\*\*\* \*\*\*\*\* \*\* \*\*\*\*\* \*\*\*\*\* \*\* \*\*\*\*\* \*\*\*\*\* \*\*\*\*\* 1380  
Vessel C \*\*\*\*\* \*\*\*\*\* \*\* \*\*\*\*\* \*\*\*\*\* \*\* \*\*\*\*\* \*\*\*\*\* \*\*\*\*\* 1380

*S. uvarum* CAAGAACTTCTGCTCAAATGCCACCTCCTCATGAAACCATCGATGACAAGATCGTTGCTA 1440  
*S. cerevisiae* CTAAACATCGGCACAAATGCCACCTCCTCATGAAAACATTGATGATAAGATTGTGGGTA 1440  
Vessel A \* \* \* \* \* \*\*\*\*\* \*\* \*\*\*\*\* \*\*\*\*\* \*\* \* \*\* 1440  
Vessel B \* \* \* \* \* \*\*\*\*\* \*\* \*\*\*\*\* \*\*\*\*\* \*\* \* \*\* 1440  
Vessel C \* \* \* \* \* \*\*\*\*\* \*\* \*\*\*\*\* \*\*\*\*\* \*\* \* \*\* 1440

*S. uvarum* ACACAGACGCAGAAAAGAATTCCACGCCTTCTGATGTTTCTTCTACCAAGAACACTGACC 1500  
*S. cerevisiae* ACACAGACGCAGAAAAGAATTCTACGCCTCCGACGCTTCTTCTACTAAGAACACTGACC 1500  
Vessel A \*\*\*\*\* \*\*\*\*\* \*\*\*\*\* \*\* \* \*\*\*\*\* \*\*\*\*\* \*\*\*\*\* \*\*\*\*\* 1500  
Vessel B \*\*\*\*\* \*\*\*\*\* \*\*\*\*\* \*\* \* \*\*\*\*\* \*\*\*\*\* \*\*\*\*\* \*\*\*\*\* 1500  
Vessel C \*\*\*\*\* \*\*\*\*\* \*\*\*\*\* \*\* \* \*\*\*\*\* \*\*\*\*\* \*\*\*\*\* \*\*\*\*\* 1500

*S. uvarum* ATATAGTATAATGATATAACCGTACAGACTATGCTCTTATTTTTTACTCATTATGTAATC 1560  
*S. cerevisiae* ATATAGTATAATGATATACTCAAGCAGACTATGATTTTA-TGTTTAATCTTTATGTAACG 1560  
Vessel A \*\*\*\*\* \*\*\*\*\* \* \*\*\*\*\* \* \*\* \* \*\*\*\*\* \*\* \*\*\*\*\* 1560  
Vessel B \*\*\*\*\* \*\*\*\*\* \* \*\*\*\*\* \* \*\* \* \*\*\*\*\* \*\* \*\*\*\*\* 1560  
Vessel C \*\*\*\*\* \*\*\*\*\* \* \*\*\*\*\* \* \*\* \* \*\*\*\*\* \*\* \*\*\*\*\* 1560
