# Supplementary material for: Recurrent Rearrangement during Adaptive Evolution in an Interspecific Yeast Hybrid Suggests a Model for Rapid Introgression
Source: PubMed Central journal article supplement (PMC3605161; doi:10.1371/journal.pgen.1003366), 2013-03-21
Supplement: pgen.1003366.s008.pdf [file pgen.1003366.s008.pdf]

**Supplementary Table 2: SNPs identified through whole genome sequencing**

| Strain             | Genome               | Chr. | Position | Systematic and Gene Name                                                                                          | SNP Effect                                 | Reference Nucleotide | SNP Nucleotide |
|--------------------|----------------------|------|----------|-------------------------------------------------------------------------------------------------------------------|--------------------------------------------|----------------------|----------------|
| GSY2532 (Vessel A) | <i>S. uvarum</i>     | 13   | 567,223  | Sbay_13.344 ( <i>S. uvarum</i> homolog of <i>YMR164C/MSSI</i> )                                                   | Non-synonymous, semi-conservative (G to A) | C                    | G              |
| GSY2533 (Vessel B) | <i>S. cerevisiae</i> | 7    | 28,807   | <i>YGL251C (HFMI)</i> coding sequence                                                                             | Non-synonymous, conservative (R to K)      | C                    | T              |
|                    | <i>S. uvarum</i>     | 15   | 354,918  | Intergenic between Sbay_15.204 and Sbay_15.206 ( <i>S. uvarum</i> homologs of <i>YHR020W</i> and <i>YHR021C</i> ) | N/A                                        | C                    | T              |
| GSY2535 (Vessel C) | <i>S. cerevisiae</i> | 4    | 243,445  | <i>YDL122W (UBP1)</i> coding sequence                                                                             | Synonymous (Y to Y)                        | C                    | T              |
|                    | <i>S. cerevisiae</i> | 5    | 405,451  | <i>YER123W (YCK3)</i> coding sequence                                                                             | Non-synonymous, conservative (L to F)      | G                    | T              |
|                    | <i>S. cerevisiae</i> | 7    | 619,623  | <i>YGR065C (VHT1)</i> coding sequence                                                                             | Non-synonymous, semi-conservative (G to A) | C                    | G              |
|                    | <i>S. cerevisiae</i> | 14   | 258,697  | <i>YNL204C (SPS18)</i> coding sequence                                                                            | Non-synonymous, non-conservative (L to W)  | A                    | C              |
|                    | <i>S. uvarum</i>     | 4    | 608,898  | Sbay_4.344 ( <i>S. uvarum</i> homolog of <i>YBR097W/VPS15</i> )                                                   | Synonymous (S to S)                        | C                    | A              |
|                    | <i>S. uvarum</i>     | 8    | 695,518  | Sbay_8.386 ( <i>S. uvarum</i> homolog of <i>YOR336W/KRE5</i> )                                                    | Non-synonymous, semi-conservative (D to G) | A                    | G              |
