# Supplementary material for: Recurrent Rearrangement during Adaptive Evolution in an Interspecific Yeast Hybrid Suggests a Model for Rapid Introgression
Source: PubMed Central journal article supplement (PMC3605161; doi:10.1371/journal.pgen.1003366), 2013-03-21
Supplement: pgen.1003366.s009.pdf [file pgen.1003366.s009.pdf]

**Supplementary Table 3. Physiological phenotypes of the ancestral interspecific hybrid in relation to three independently evolved clones.** Estimates of cell density, biomass and residual glucose were derived from culturing single colony isolates of the ancestral *S. cerevisiae* x *S. uvarum* interspecific hybrid (GSY86) and 3 evolved isolates (GSY2532, GSY2533, GSY2535). Samples were removed from aerobic, inorganic nitrogen-limited chemostats at steady state,  $D=0.16 \text{ h}^{-1}$ . We used a one-way ANOVA followed by a Student-Newman-Kuels test to detect significant differences. Different lettering in superscript indicates resolved significant differences between isolates;  $n=3$ . For all strains, residual ammonium was near or below the assay detection limit (0.01 ppm).

| <b>Strain</b>  | <b>A600</b><br>Mean (S.E.) | <b>Dry weight</b><br>( $\text{mg L}^{-1}$ )<br>Mean (S.E.) | <b>Residual</b><br><b>Glucose</b><br>( $\text{g l}^{-1}$ )<br>Mean (S.E.) |
|----------------|----------------------------|------------------------------------------------------------|---------------------------------------------------------------------------|
| <b>GSY86</b>   | 1.04 (0.05)                | 737 (24.0) <sup>a</sup>                                    | 1.51 (0.2)                                                                |
| <b>GSY2532</b> | 1.08 (0.02)                | 807 (19.5) <sup>b</sup>                                    | 1.69 (0.17)                                                               |
| <b>GSY2533</b> | 1.05 (0.03)                | 726 (8.1) <sup>a</sup>                                     | 1.59 (0.26)                                                               |
| <b>GSY2535</b> | 1.16 (0.02)                | 852 (12.5) <sup>b</sup>                                    | 1.74 (0.36)                                                               |
| <b>ANOVA</b>   | $P=0.8$                    | $P=0.002^*$                                                | $P=0.92$                                                                  |
